# Supplementary material for: Socioeconomic status and environmental noise exposure in Montreal, Canada
Source: Springer Nature journal article supplement (doi:10.1186/s12889-015-1571-2), 2015-02-27
Supplement: MOESM1 [file 9748970]

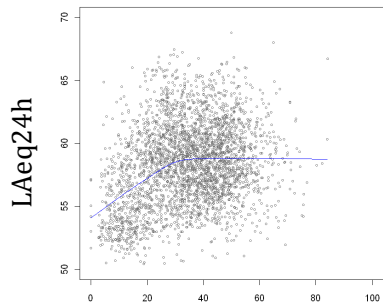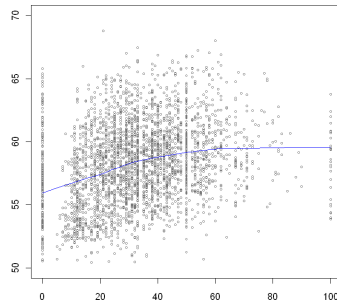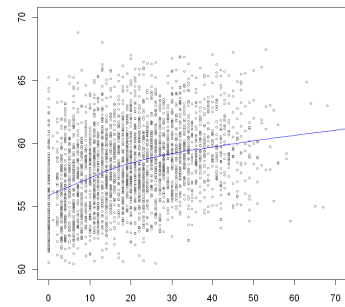

Proportion of households with 1 person

Unemployment rate

Proportion of people over age 25 without a diploma

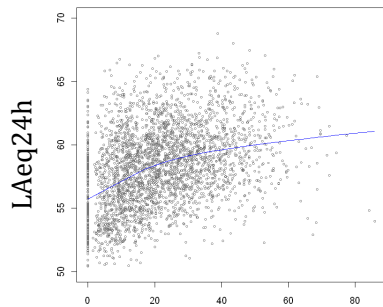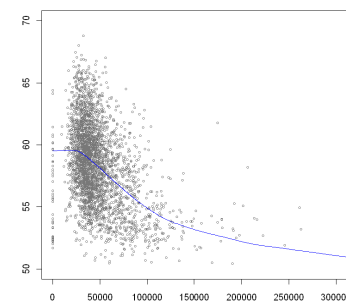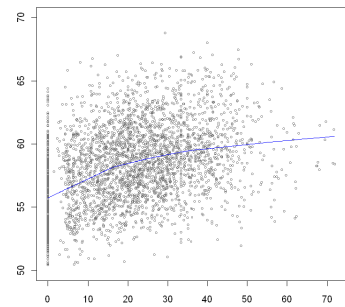

Proportion of people below the low income boundary

Median household income

Proportion of people who spend over 30 % of their income on housing

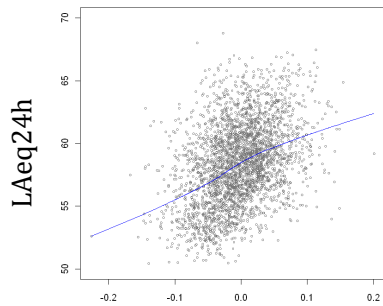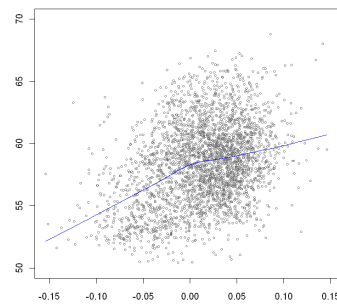

Material deprivation index

Social deprivation index
